# Supplementary material for: Association of dietary overall antioxidant intake with all-cause and cause-specific mortality among adults with depression: evidence from NHANES 2005–2018
Source: Royal Society of Chemistry journal article supplement (doi:10.1039/d4fo00236a), 2024-01-01
Supplement: d4fo00236a1.pdf [file d4fo00236a1.pdf]

**Association of dietary overall antioxidant intake with all-cause and cause-specific mortality among adults with depression: evidence from NHANES 2005-2018**

Wenjie Wang<sup>1,2\*</sup>; Yuwei Shi<sup>1,2\*</sup>; Jiakai Zhang<sup>1,2</sup>; Yifeng Wang<sup>1,2</sup>; Therese Martin Cheteu Wabo<sup>1,2</sup>; Yang Yang<sup>1,2</sup>; Wei He<sup>1,2\*\*</sup>; Shankuan Zhu<sup>1,2\*\*</sup>

1. Chronic Disease Research Institute, The Children's Hospital, and National Clinical Research Center for Child Health, School of Public Health, School of Medicine, Zhejiang University, Hangzhou, Zhejiang, China
2. Department of Nutrition and Food Hygiene, School of Public Health, Zhejiang University, Hangzhou, Zhejiang, China

\*\*Corresponding Author: Shankuan Zhu, PhD, Chronic Disease Research Institute, The Children's Hospital, National Clinical Research Center for Child Health, School of Public Health, School of Medicine, Zhejiang University, 866 Yu-hang-tang Road, Hangzhou, Zhejiang, 310058 China. Email: zsk@zju.edu.cn

\*\*Corresponding Author: Wei He, PhD, Chronic Disease Research Institute, The Children's Hospital, National Clinical Research Center for Child Health, School of Public Health, School of Medicine, Zhejiang University, 866 Yu-hang-tang Road, Hangzhou, Zhejiang, 310058 China. Email: zjuhewei@zju.edu.cn.

\* Contributed equally as first authors

**Supplementary Table 1** Generic names of antidepressant drugs used by participants in the NHANES 2005-2018

---

|               |               |
|---------------|---------------|
| Amitriptyline | Imipramine    |
| Bupropion     | Mirtazapine   |
| Buspirone     | Nefazodone    |
| Citalopram    | Nortriptyline |
| Escitalopram  | Paroxetine    |
| sertraline    | Protriptyline |
| Fluoxetine    | Venlafaxine   |

---

**Supplementary Table 2** Subgroup analyses of the association of dietary antioxidant quality score (DAQs) and dietary quality index (DAI) with all-cause mortality among adults with depression in the NHANES 2005-2018

|                     | Dietary antioxidant quality score (DAQs) |                 |                 | P-trend | P interaction |
|---------------------|------------------------------------------|-----------------|-----------------|---------|---------------|
|                     | 0-2                                      | 3-4             | 5-6             |         |               |
| Age                 |                                          |                 |                 |         | 0.811         |
| <60                 | 1.00                                     | 0.61(0.35-1.08) | 0.69(0.39-1.22) | 0.168   |               |
| ≥60                 | 1.00                                     | 0.72(0.47-1.10) | 0.56(0.34-0.91) | 0.020   |               |
| Gender              |                                          |                 |                 |         | 0.525         |
| Male                | 1.00                                     | 0.66(0.41-1.05) | 0.77(0.42-1.39) | 0.315   |               |
| Female              | 1.00                                     | 0.70(0.46-1.07) | 0.56(0.33-0.95) | 0.027   |               |
| Body mass index     |                                          |                 |                 |         | <0.001        |
| Overweight          | 1.00                                     | 0.63(0.41-0.97) | 0.58(0.36-0.94) | 0.023   |               |
| Normal              | 1.00                                     | 0.89(0.49-1.64) | 0.85(0.44-1.62) | 0.607   |               |
| Smoking status      |                                          |                 |                 |         | 0.317         |
| Never               | 1.00                                     | 0.58(0.35-0.97) | 0.50(0.29-0.87) | 0.010   |               |
| Ever or current     | 1.00                                     | 0.78(0.51-1.21) | 0.78(0.49-1.27) | 0.324   |               |
| Alcohol consumption |                                          |                 |                 |         | 0.282         |
| None-drinker        | 1.00                                     | 0.68(0.34-1.33) | 0.56(0.31-1.01) | 0.061   |               |
| Drinker             | 1.00                                     | 0.71(0.48-1.05) | 0.66(0.41-1.08) | 0.081   |               |
| NCDs                |                                          |                 |                 |         | 0.035         |
| Yes                 | 1.00                                     | 0.67(0.47-0.95) | 0.71(0.46-1.01) | 0.095   |               |
| No                  | 1.00                                     | 0.77(0.33-1.79) | 0.19(0.05-0.67) | 0.014   |               |
|                     | Dietary antioxidant index (DAI)          |                 |                 | P-trend | P interaction |
|                     | Tertile1                                 | Tertile2        | Tertile3        |         |               |
| Age                 |                                          |                 |                 |         | 0.851         |
| <60                 | 1.00                                     | 0.77(0.45-1.32) | 0.63(0.36-1.08) | 0.097   |               |
| ≥60                 | 1.00                                     | 0.85(0.58-1.27) | 0.78(0.49-1.26) | 0.304   |               |
| Gender              |                                          |                 |                 |         | 0.762         |
| Male                | 1.00                                     | 0.78(0.46-1.33) | 0.65(0.38-1.11) | 0.113   |               |
| Female              | 1.00                                     | 0.86(0.59-1.24) | 0.75(0.45-1.25) | 0.245   |               |
| Body mass index     |                                          |                 |                 |         | <0.001        |
| Overweight          | 1.00                                     | 0.85(0.57-1.26) | 0.62(0.39-0.99) | 0.055   |               |
| Normal              | 1.00                                     | 0.87(0.43-1.75) | 1.01(0.59-1.71) | 0.963   |               |
| Smoking status      |                                          |                 |                 |         | 0.359         |
| Never               | 1.00                                     | 0.78(0.48-1.27) | 0.52(0.31-0.85) | 0.017   |               |
| Ever or current     | 1.00                                     | 0.86(0.54-1.35) | 0.89(0.54-1.46) | 0.655   |               |
| Alcohol consumption |                                          |                 |                 |         | 0.707         |
| None-drinker        | 1.00                                     | 1.44(0.74-2.80) | 0.76(0.32-1.78) | 0.754   |               |
| Drinker             | 1.00                                     | 0.68(0.45-1.01) | 0.67(0.45-0.98) | 0.041   |               |
| NCDs                |                                          |                 |                 |         | 0.261         |
| Yes                 | 1.00                                     | 0.81(0.59-1.12) | 0.77(0.54-1.09) | 0.127   |               |
| No                  | 1.00                                     | 0.92(0.31-2.69) | 0.37(0.11-1.26) | 0.103   |               |

The model was adjusted for age, sex and race/ethnicity, body mass index, smoking status, alcohol consumption, education level, annual household income, physical activity, fatty acid ratio,

cholesterol intake, dietary supplements use, self-reported chronic non-communicable diseases (NCDs) including diabetes, hypertension, dyslipidemia, heart disease and cancer, family history of heart diseases and antidepressants use, with exception of stratifying factors.

**Supplementary Table 3** Association of dietary antioxidant quality score (DAQs) and dietary antioxidant index (DAI) with all-cause and cause-specific mortality among depressed adults after excluding participants who died within 2 years (n = 2,740)

|                            | Dietary antioxidant quality score (DAQs) |                 |                 | P-trend |
|----------------------------|------------------------------------------|-----------------|-----------------|---------|
|                            | 0-2                                      | 3-4             | 5-6             |         |
| <b>All-cause mortality</b> |                                          |                 |                 |         |
| Case/n                     | 110/909                                  | 111/1126        | 66/705          |         |
| Model 1 <sup>a</sup>       | 1.00                                     | 0.60(0.42-0.87) | 0.59(0.38-0.94) | 0.022   |
| Model 2 <sup>b</sup>       | 1.00                                     | 0.63(0.43-0.94) | 0.65(0.41-1.02) | 0.054   |
| Model 3 <sup>c</sup>       | 1.00                                     | 0.64(0.43-0.95) | 0.65(0.41-1.03) | 0.056   |
| <b>CVD mortality</b>       |                                          |                 |                 |         |
| Case/n                     | 26/909                                   | 35/1126         | 21/705          |         |
| Model 1 <sup>a</sup>       | 1.00                                     | 1.38(0.73-2.62) | 1.05(0.46-2.39) | 0.889   |
| Model 2 <sup>b</sup>       | 1.00                                     | 1.44(0.74-2.78) | 1.20(0.53-2.67) | 0.649   |
| Model 3 <sup>c</sup>       | 1.00                                     | 1.51(0.78-2.92) | 1.17(0.51-2.65) | 0.701   |
| <b>Cancer mortality</b>    |                                          |                 |                 |         |
| Case/n                     | 27/909                                   | 22/1126         | 10/705          |         |
| Model 1 <sup>a</sup>       | 1.00                                     | 0.31(0.15-0.66) | 0.31(0.12-0.80) | 0.013   |
| Model 2 <sup>b</sup>       | 1.00                                     | 0.33(0.16-0.67) | 0.35(0.14-0.84) | 0.013   |
| Model 3 <sup>c</sup>       | 1.00                                     | 0.33(0.16-0.68) | 0.36(0.15-0.85) | 0.015   |
|                            | Dietary antioxidant index (DAI)          |                 |                 | P-trend |
|                            | Tertile 1                                | Tertile 2       | Tertile 3       |         |
| <b>All-cause mortality</b> |                                          |                 |                 |         |
| Case/n                     | 103/914                                  | 100/913         | 84/913          |         |
| Model 1 <sup>a</sup>       | 1.00                                     | 0.73(0.51-1.04) | 0.67(0.47-0.97) | 0.034   |
| Model 2 <sup>b</sup>       | 1.00                                     | 0.76(0.53-1.08) | 0.73(0.50-1.08) | 0.105   |
| Model 3 <sup>c</sup>       | 1.00                                     | 0.76(0.53-1.09) | 0.74(0.50-1.08) | 0.113   |
| <b>CVD mortality</b>       |                                          |                 |                 |         |
| Case/n                     | 24/914                                   | 29/913          | 29/913          |         |
| Model 1 <sup>a</sup>       | 1.00                                     | 1.37(0.76-2.48) | 1.49(0.76-2.94) | 0.246   |
| Model 2 <sup>b</sup>       | 1.00                                     | 1.48(0.78-2.80) | 1.71(0.81-3.60) | 0.156   |
| Model 3 <sup>c</sup>       | 1.00                                     | 1.50(0.79-2.84) | 1.72(0.80-3.71) | 0.167   |
| <b>Cancer mortality</b>    |                                          |                 |                 |         |
| Case/n                     | 26/914                                   | 18/913          | 15/913          |         |
| Model 1 <sup>a</sup>       | 1.00                                     | 0.64(0.28-1.48) | 0.34(0.15-0.79) | 0.012   |
| Model 2 <sup>b</sup>       | 1.00                                     | 0.74(0.32-1.76) | 0.39(0.20-0.78) | 0.012   |
| Model 3 <sup>c</sup>       | 1.00                                     | 0.74(0.31-1.74) | 0.39(0.19-0.79) | 0.014   |

<sup>a</sup> Model 1 was adjusted for age, sex and race/ethnicity.

<sup>b</sup> Model 2 was additionally adjusted for body mass index, smoking status, alcohol consumption, education level, annual household income, physical activity, fatty acid ratio, cholesterol intake and dietary supplements use.

<sup>c</sup> Model 3 was additionally adjusted for self-reported chronic non-communicable diseases (NCDs) including diabetes, hypertension, dyslipidemia, heart disease and cancer, family history of heart diseases and antidepressants use.

**Supplementary Table 4** Association of dietary antioxidant quality score (DAQs) and dietary antioxidant index (DAI) with all-cause and cause-specific mortality among depressed adults after excluding participants with a history of cancer (n = 2,720)

|                            | <b>Dietary antioxidant quality score (DAQs)</b> |                  |                  | <b>P-trend</b> |
|----------------------------|-------------------------------------------------|------------------|------------------|----------------|
|                            | <b>0-2</b>                                      | <b>3-4</b>       | <b>5-6</b>       |                |
| <b>All-cause mortality</b> |                                                 |                  |                  |                |
| Case/n                     | 113/911                                         | 124/1110         | 65/699           |                |
| Model 1 <sup>a</sup>       | 1.00                                            | 0.70(0.49-1.00)  | 0.52(0.33-0.81)  | 0.004          |
| Model 2 <sup>b</sup>       | 1.00                                            | 0.75(0.51-1.08)  | 0.60(0.38-0.95)  | 0.026          |
| Model 3 <sup>c</sup>       | 1.00                                            | 0.75(0.51-1.09)  | 0.61(0.38-0.97)  | 0.031          |
| <b>CVD mortality</b>       |                                                 |                  |                  |                |
| Case/n                     | 28/911                                          | 49/1110          | 24/699           |                |
| Model 1 <sup>a</sup>       | 1.00                                            | 1.35(0.69-2.66)  | 1.09(0.48-2.46)  | 0.820          |
| Model 2 <sup>b</sup>       | 1.00                                            | 1.39(0.67-2.88)  | 1.20(0.53-2.73)  | 0.647          |
| Model 3 <sup>c</sup>       | 1.00                                            | 1.42(0.68-2.95)  | 1.19(0.51-2.77)  | 0.669          |
| <b>Cancer mortality</b>    |                                                 |                  |                  |                |
| Case/n                     | 22/911                                          | 18/1110          | 6/699            |                |
| Model 1 <sup>a</sup>       | 1.00                                            | 0.36(0.16-0.80)  | 0.26(0.09-0.77)  | 0.010          |
| Model 2 <sup>b</sup>       | 1.00                                            | 0.46(0.19-1.08)  | 0.37(0.14-1.02)  | 0.041          |
| Model 3 <sup>c</sup>       | 1.00                                            | 0.46(0.19-1.11)  | 0.36(0.13-0.96)  | 0.031          |
|                            | <b>Dietary antioxidant index (DAI)</b>          |                  |                  | <b>P-trend</b> |
|                            | <b>Tertile 1</b>                                | <b>Tertile 2</b> | <b>Tertile 3</b> |                |
| <b>All-cause mortality</b> |                                                 |                  |                  |                |
| Case/n                     | 103/907                                         | 120/907          | 79/906           |                |
| Model 1 <sup>a</sup>       | 1.00                                            | 0.84(0.59-1.21)  | 0.62(0.42-0.91)  | 0.016          |
| Model 2 <sup>b</sup>       | 1.00                                            | 0.91(0.63-1.30)  | 0.70(0.46-1.05)  | 0.094          |
| Model 3 <sup>c</sup>       | 1.00                                            | 0.91(0.63-1.30)  | 0.70(0.46-1.05)  | 0.099          |
| <b>CVD mortality</b>       |                                                 |                  |                  |                |
| Case/n                     | 26/907                                          | 35/907           | 31/906           |                |
| Model 1 <sup>a</sup>       | 1.00                                            | 1.32(0.70-2.50)  | 1.44(0.73-2.88)  | 0.287          |
| Model 2 <sup>b</sup>       | 1.00                                            | 1.49(0.77-2.88)  | 1.63(0.81-3.24)  | 0.156          |
| Model 3 <sup>c</sup>       | 1.00                                            | 1.45(0.75-2.82)  | 1.62(0.79-3.32)  | 0.176          |
| <b>Cancer mortality</b>    |                                                 |                  |                  |                |
| Case/n                     | 20/907                                          | 17/907           | 9/906            |                |
| Model 1 <sup>a</sup>       | 1.00                                            | 0.95(0.40-2.26)  | 0.27(0.10-0.69)  | 0.007          |
| Model 2 <sup>b</sup>       | 1.00                                            | 1.34(0.57-3.14)  | 0.40(0.18-0.89)  | 0.108          |
| Model 3 <sup>c</sup>       | 1.00                                            | 1.26(0.57-2.81)  | 0.39(0.18-0.87)  | 0.080          |

<sup>a</sup> Model 1 was adjusted for age, sex and race/ethnicity.

<sup>b</sup> Model 2 was additionally adjusted for body mass index, smoking status, alcohol consumption, education level, annual household income, physical activity, fatty acid ratio, cholesterol intake and dietary supplements use.

<sup>c</sup> Model 3 was additionally adjusted for self-reported chronic non-communicable diseases (NCDs) including diabetes, hypertension, dyslipidemia, heart disease and cancer, family history of heart diseases and antidepressants use.

**Supplementary Table 5** Association of dietary antioxidant quality score (DAQs) and dietary antioxidant index (DAI) with all-cause and cause-specific mortality among depressed adults after excluding participants with a history of CVD (n = 2,597)

|                            | Dietary antioxidant quality score (DAQs) |                 |                 | <i>P</i> -trend |
|----------------------------|------------------------------------------|-----------------|-----------------|-----------------|
|                            | 0-2                                      | 3-4             | 5-6             |                 |
| <b>All-cause mortality</b> |                                          |                 |                 |                 |
| Case/n                     | 86/844                                   | 91/1062         | 62/691          |                 |
| Model 1 <sup>a</sup>       | 1.00                                     | 0.60(0.39-0.91) | 0.56(0.35-0.90) | 0.017           |
| Model 2 <sup>b</sup>       | 1.00                                     | 0.61(0.36-0.94) | 0.58(0.36-0.94) | 0.028           |
| Model 3 <sup>c</sup>       | 1.00                                     | 0.60(0.39-0.93) | 0.59(0.37-0.96) | 0.033           |
| <b>CVD mortality</b>       |                                          |                 |                 |                 |
| Case/n                     | 19/844                                   | 24/1062         | 17/691          |                 |
| Model 1 <sup>a</sup>       | 1.00                                     | 1.05(0.46-2.40) | 1.05(0.40-2.74) | 0.928           |
| Model 2 <sup>b</sup>       | 1.00                                     | 1.09(0.46-2.58) | 1.14(0.43-3.03) | 0.795           |
| Model 3 <sup>c</sup>       | 1.00                                     | 1.11(0.47-2.62) | 1.11(0.41-3.00) | 0.839           |
| <b>Cancer mortality</b>    |                                          |                 |                 |                 |
| Case/n                     | 20/844                                   | 17/1062         | 10/691          |                 |
| Model 1 <sup>a</sup>       | 1.00                                     | 0.31(0.15-0.66) | 0.31(0.12-0.80) | 0.025           |
| Model 2 <sup>b</sup>       | 1.00                                     | 0.30(0.13-0.68) | 0.30(0.12-0.74) | 0.010           |
| Model 3 <sup>c</sup>       | 1.00                                     | 0.29(0.12-0.70) | 0.31(0.12-0.76) | 0.012           |
|                            | Dietary antioxidant index (DAI)          |                 |                 | <i>P</i> -trend |
|                            | Tertile 1                                | Tertile 2       | Tertile 3       |                 |
| <b>All-cause mortality</b> |                                          |                 |                 |                 |
| Case/n                     | 76/866                                   | 89/866          | 74/865          |                 |
| Model 1 <sup>a</sup>       | 1.00                                     | 0.85(0.56-1.29) | 0.78(0.51-1.20) | 0.092           |
| Model 2 <sup>b</sup>       | 1.00                                     | 0.76(0.53-1.08) | 0.73(0.50-1.08) | 0.105           |
| Model 3 <sup>c</sup>       | 1.00                                     | 0.86(0.56-1.30) | 0.78(0.51-1.02) | 0.054           |
| <b>CVD mortality</b>       |                                          |                 |                 |                 |
| Case/n                     | 17/866                                   | 22/866          | 21/866          |                 |
| Model 1 <sup>a</sup>       | 1.00                                     | 1.22(0.54-2.72) | 1.55(0.65-3.73) | 0.324           |
| Model 2 <sup>b</sup>       | 1.00                                     | 1.43(0.61-3.32) | 1.81(0.72-4.54) | 0.198           |
| Model 3 <sup>c</sup>       | 1.00                                     | 1.43(0.60-3.38) | 1.80(0.70-4.63) | 0.216           |
| <b>Cancer mortality</b>    |                                          |                 |                 |                 |
| Case/n                     | 18/866                                   | 14/866          | 15/865          |                 |
| Model 1 <sup>a</sup>       | 1.00                                     | 0.64(0.25-1.68) | 0.41(0.16-1.03) | 0.057           |
| Model 2 <sup>b</sup>       | 1.00                                     | 0.77(0.28-2.08) | 0.42(0.20-0.92) | 0.038           |
| Model 3 <sup>c</sup>       | 1.00                                     | 0.76(0.28-2.06) | 0.43(0.19-0.96) | 0.047           |

<sup>a</sup> Model 1 was adjusted for age, sex and race/ethnicity.

<sup>b</sup> Model 2 was additionally adjusted for body mass index, smoking status, alcohol consumption, education level, annual household income, physical activity, fatty acid ratio, cholesterol intake and dietary supplements use.

<sup>c</sup> Model 3 was additionally adjusted for self-reported chronic non-communicable diseases (NCDs) including diabetes, hypertension, dyslipidemia, heart disease and cancer, family history of heart diseases and antidepressants use.

**Supplementary Table 6** Association between depression and all-cause and cause-specific mortality in the NHANES 2005-2018 (n = 36,308)

|                     | <b>Non-depression</b> | <b>Depression</b> | <b>P-value</b> |
|---------------------|-----------------------|-------------------|----------------|
| All-cause mortality |                       |                   |                |
| Model 1             | 1.00                  | 2.20(1.92-2.53)   | <0.001         |
| Model 2             | 1.00                  | 1.52(1.30-1.78)   | <0.001         |
| Model 3             | 1.00                  | 1.47(1.26-1.72)   | <0.001         |
| CVD mortality       |                       |                   |                |
| Model 1             | 1.00                  | 2.27(1.84-2.81)   | <0.001         |
| Model 2             | 1.00                  | 1.54(1.16-2.04)   | 0.003          |
| Model 3             | 1.00                  | 1.48(1.11-1.96)   | 0.008          |
| Cancer mortality    |                       |                   |                |
| Model 1             | 1.00                  | 1.50(1.09-2.08)   | 0.014          |
| Model 2             | 1.00                  | 1.08(0.73-1.59)   | 0.691          |
| Model 3             | 1.00                  | 1.04(0.71-1.52)   | 0.824          |

<sup>a</sup> Model 1 was adjusted for age, sex, and race/ethnicity.

<sup>b</sup> Model 2 was additionally adjusted for body mass index, smoking status, alcohol consumption, education level, annual household income, physical activity, fatty acid ratio, cholesterol intake, and dietary supplements use.

<sup>c</sup> Model 3 was additionally adjusted for self-reported chronic non-communicable diseases (NCDs) including diabetes, hypertension, dyslipidemia, heart disease and cancer, family history of heart diseases and antidepressants use.



**Supplementary Table 7** Differences in food intake among adults with and without depression in the NHANES 2005-2018 <sup>a</sup>

| <b>Characteristics <sup>b</sup></b> | <b>Non-depression<br/>(n=3051)</b> | <b>Depression<br/>(n=3051)</b> | <b>P-value</b> |
|-------------------------------------|------------------------------------|--------------------------------|----------------|
| Total Fruits (cup eq./day)          | 1.09(0.02)                         | 0.79(0.02)                     | <0.001         |
| Total Vegetables (cup eq./day)      | 1.53(0.02)                         | 1.24(0.02)                     | <0.001         |
| Total grains (oz. eq./day)          | 6.28(0.06)                         | 6.04(0.07)                     | 0.007          |
| Total dairy (cup eq./day)           | 1.46(0.02)                         | 1.42(0.02)                     | 0.228          |
| Meats (oz. eq./day)                 |                                    |                                |                |
| Processed meat                      | 0.93(0.02)                         | 0.91(0.02)                     | 0.393          |
| Red meat                            | 1.51(0.04)                         | 1.62(0.04)                     | 0.047          |
| Organ meat                          | 0.03(0.01)                         | 0.03(0.01)                     | 0.789          |
| Poultry                             | 1.50(0.03)                         | 1.40(0.04)                     | 0.052          |
| Seafood                             | 0.63(0.03)                         | 0.50(0.03)                     | 0.001          |
| Others                              |                                    |                                |                |
| Legumes (oz. eq./day)               | 0.47(0.02)                         | 0.48(0.02)                     | 0.593          |
| Nuts (oz. eq./day)                  | 1.26(0.02)                         | 1.17(0.02)                     | <0.001         |
| Solid fats (grams/day)              | 36.99(0.42)                        | 34.55(0.42)                    | <0.001         |
| Added sugar (tsp. eq./day)          | 17.26(0.25)                        | 19.18(0.30)                    | <0.001         |

<sup>a</sup> PHQ-9 scores  $\geq 10$  were considered to indicate individuals with depression. The control and depression groups were matched by sex and age ( $\pm 2$  years), and the number of control and depression groups was 1:1.

<sup>b</sup> All variables are represented as mean (standard error).

**Supplementary Table 8** Differences in individual dietary antioxidant nutrients intake among adults with and without depression in the NHANES 2005-2018 <sup>a</sup>

| <b>Characteristics <sup>b</sup></b> | <b>Non-depression<br/>(n=3051)</b> | <b>Depression<br/>(n=3051)</b> | <b><i>P</i>-value</b> |
|-------------------------------------|------------------------------------|--------------------------------|-----------------------|
| Vitamin A (mg/day)                  | 615.27(10.11)                      | 553.14(11.55)                  | <0.001                |
| Vitamin C (mg/day)                  | 93.60(1.51)                        | 70.98(1.38)                    | <0.001                |
| Vitamin E (mg/day)                  | 6.90(0.08)                         | 6.97(0.09)                     | 0.523                 |
| Magnesium (mg/day)                  | 280.92(2.14)                       | 259.16(2.24)                   | <0.001                |
| Selenium (mcg/day)                  | 104.15(0.86)                       | 100.17(0.96)                   | 0.001                 |
| Zinc (mg/day)                       | 11.62(0.14)                        | 10.17(0.11)                    | <0.001                |

<sup>a</sup> PHQ-9 scores  $\geq 10$  were considered to indicate individuals with depression. The control and depression groups were matched by sex and age ( $\pm 2$  years), and the number of control and depression groups was 1:1.

<sup>b</sup> All variables are represented as mean (standard error).

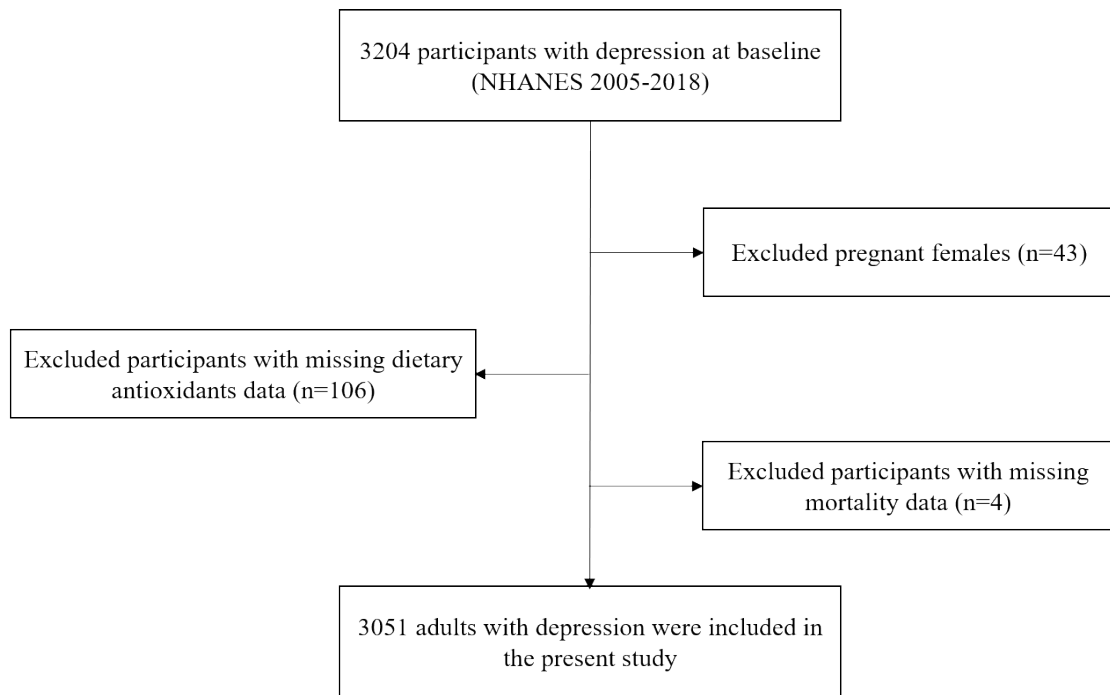

**Supplementary Figure 1** Flow chat of participants included in the present study

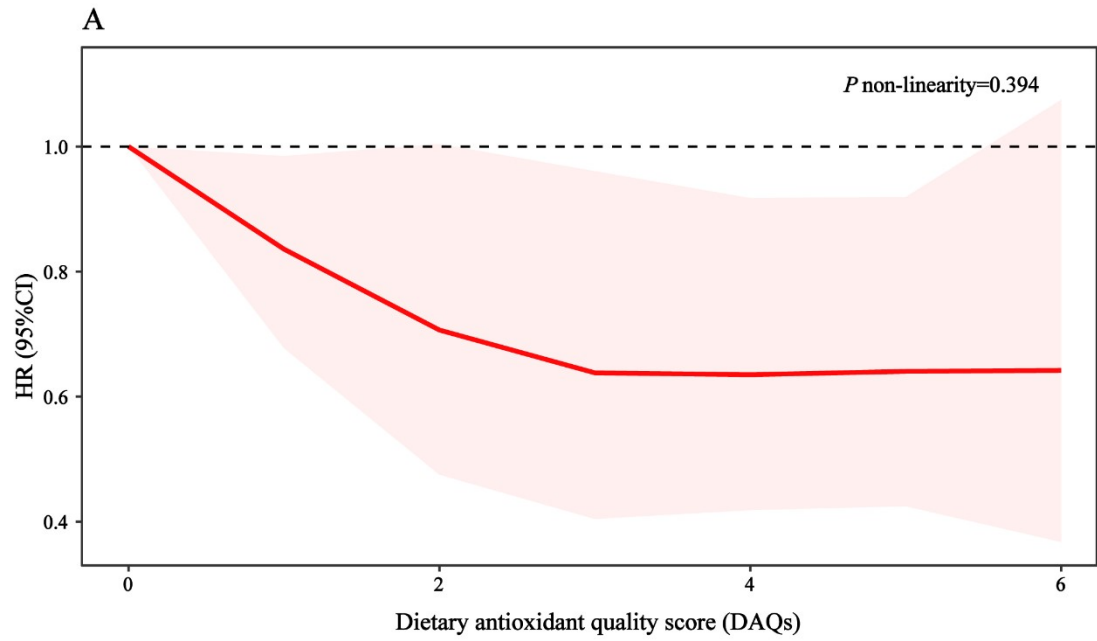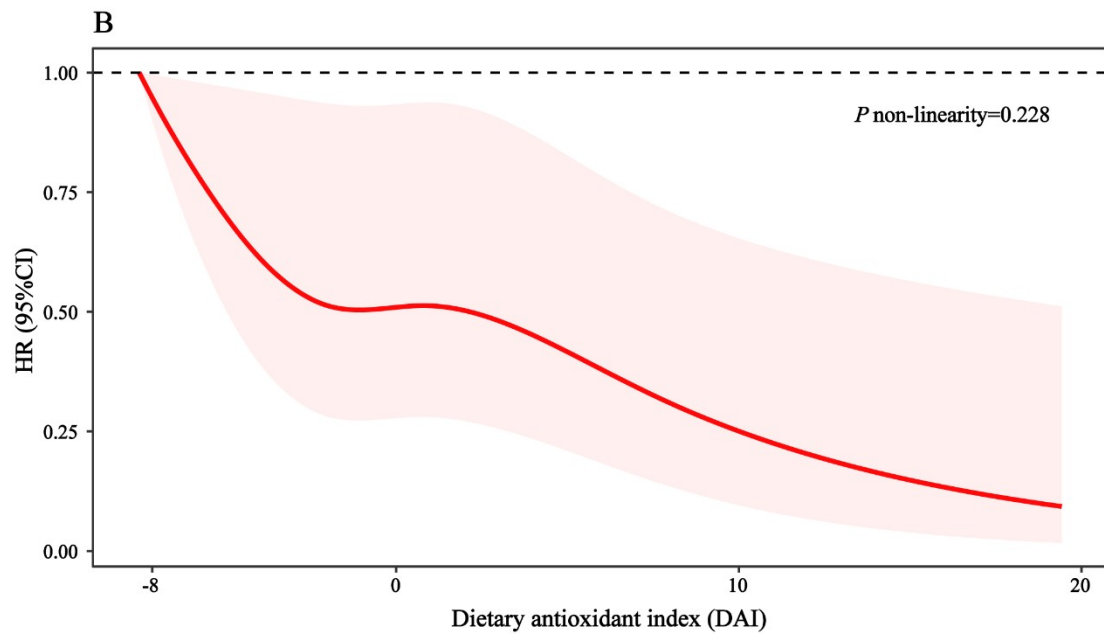

**Supplementary Figure 2** Dose-response associations of dietary antioxidant quality score (DAQs) and dietary antioxidant index (DAI) with all-cause mortality in adults with depression from the NHANES 2005-2018.
